# Supplementary material for: A cross-sectional study of website claims related to diagnoses and treatment of non-musculoskeletal conditions
Source: Chiropr Man Therap. 2020 Mar 30;28:16. doi: 10.1186/s12998-020-00305-w (PMC7106824; doi:10.1186/s12998-020-00305-w)
Supplement: Supplementary file 1 — Additional file 1. Data collection tool. [file 12998_2020_305_MOESM1_ESM.pdf]

# Additional file 1

Data collection tool for non-musculoskeletal symptoms and diagnosis

| Original data collection tool developed from 25 websites | Additional symptoms and diagnosis added                | Present = 1<br>Not present = 0 | MSK based explanation |
|----------------------------------------------------------|--------------------------------------------------------|--------------------------------|-----------------------|
| Abdominal pain                                           |                                                        |                                |                       |
| Allergy                                                  |                                                        |                                |                       |
| Asthma                                                   |                                                        |                                |                       |
|                                                          | Attention-deficit/hyperreactive disorder (in children) |                                |                       |
|                                                          | Changes in mood (in children)                          |                                |                       |
| Chronic fatigue syndrome (CFS)                           |                                                        |                                |                       |
| Chronic Obstructive Pulmonary Disease                    |                                                        |                                |                       |
|                                                          | Common cold                                            |                                |                       |
|                                                          | Complex regional pain syndrome (Type 1)                |                                |                       |
| Concentration problems (in children)                     |                                                        |                                |                       |
|                                                          | Concussion                                             |                                |                       |
| Constipation/digestive problems                          |                                                        |                                |                       |
|                                                          | Eye and ear pain                                       |                                |                       |
|                                                          | High blood pressure                                    |                                |                       |
|                                                          | Highly sensitive children                              |                                |                       |
|                                                          | Hormonal imbalance                                     |                                |                       |
|                                                          | Hyperactivity/restlessness (in children)               |                                |                       |
|                                                          | Immune system                                          |                                |                       |
|                                                          | Impotence                                              |                                |                       |
|                                                          | Incontinence/bed-wetting (in children)                 |                                |                       |
|                                                          | Infection                                              |                                |                       |
| Insomnia/unease/discontent (in children)                 |                                                        |                                |                       |
| Internal organs                                          |                                                        |                                |                       |
| Irritable bowel syndrome                                 |                                                        |                                |                       |
|                                                          | Language, reading or writing difficulties              |                                |                       |
| Learning problem (in children)                           |                                                        |                                |                       |
| Low blood pressure                                       |                                                        |                                |                       |
| Ménière's disease                                        |                                                        |                                |                       |
|                                                          | Menstrual cramps/pains                                 |                                |                       |
|                                                          | Nausea                                                 |                                |                       |
|                                                          | Osteoporosis                                           |                                |                       |
| Otitis media/ear infection (in children)                 |                                                        |                                |                       |

|                                          |                                                     |  |  |
|------------------------------------------|-----------------------------------------------------|--|--|
|                                          | Problems with suckling/breast-feeding (in children) |  |  |
| Respiratory problems (other than asthma) |                                                     |  |  |
|                                          | Shingles (herpes zoster)                            |  |  |
|                                          | Sinusitis                                           |  |  |
|                                          | Swelling/ bleeding/wound                            |  |  |
|                                          | Tinnitus                                            |  |  |
|                                          | Trigeminal neuralgia                                |  |  |
|                                          | Tumour                                              |  |  |
| Vestibular neuronitis                    |                                                     |  |  |
|                                          | Vision impairment/disturbance                       |  |  |
